# Supplementary material for: Activation of the intrinsic fibroinflammatory program in adult pancreatic acinar cells triggered by Hippo signaling disruption
Source: PubMed Central journal article supplement (PMC6742234; doi:10.1371/journal.pbio.3000418), 2019-09-12

Fig 1B

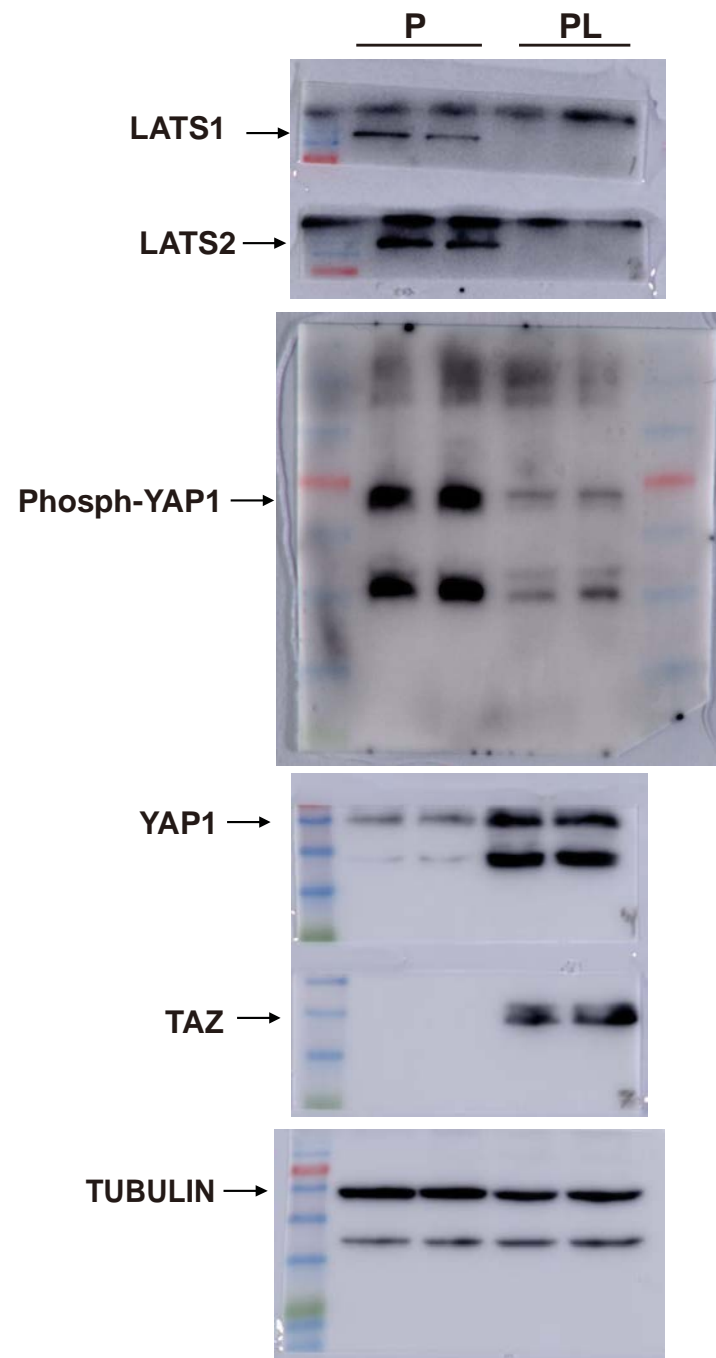

Fig 2A

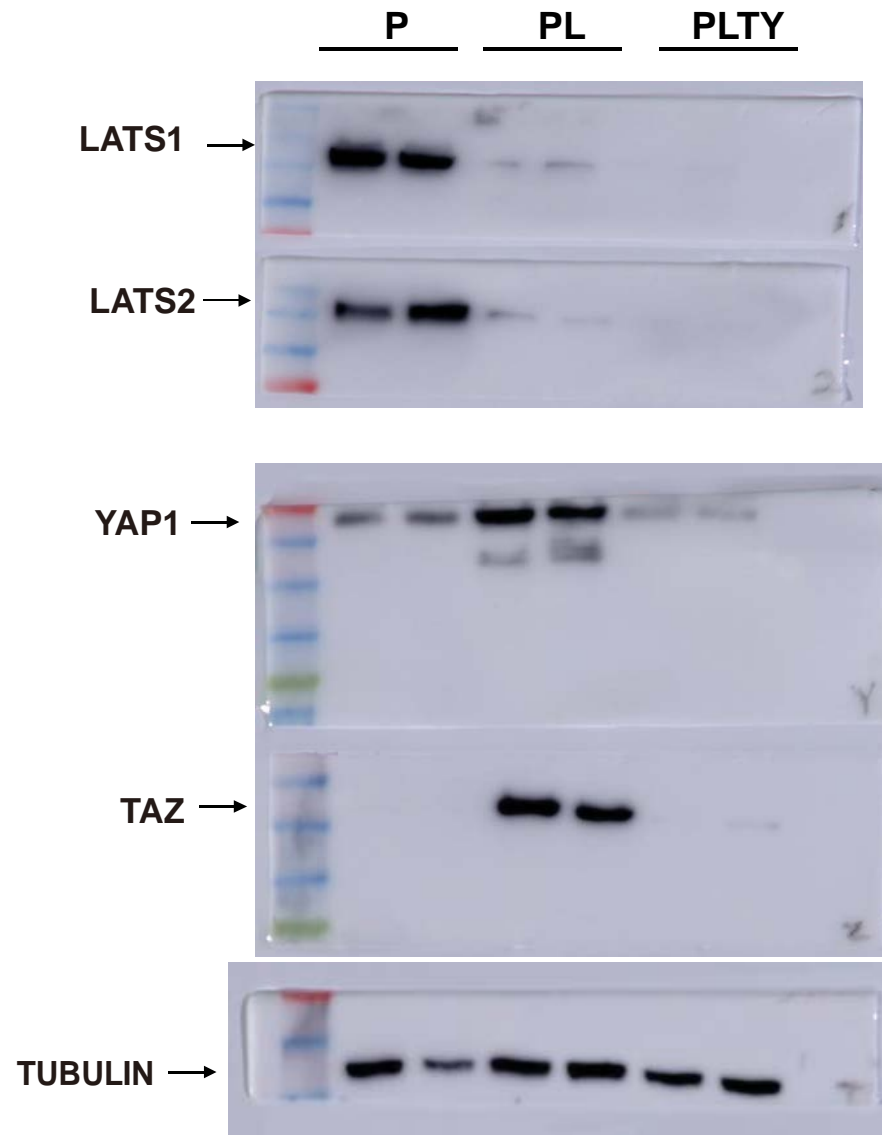

Fig 7B

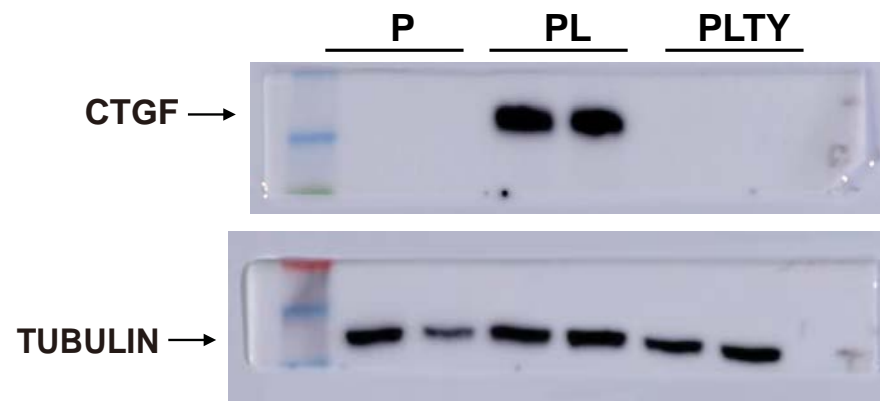

Fig 8C

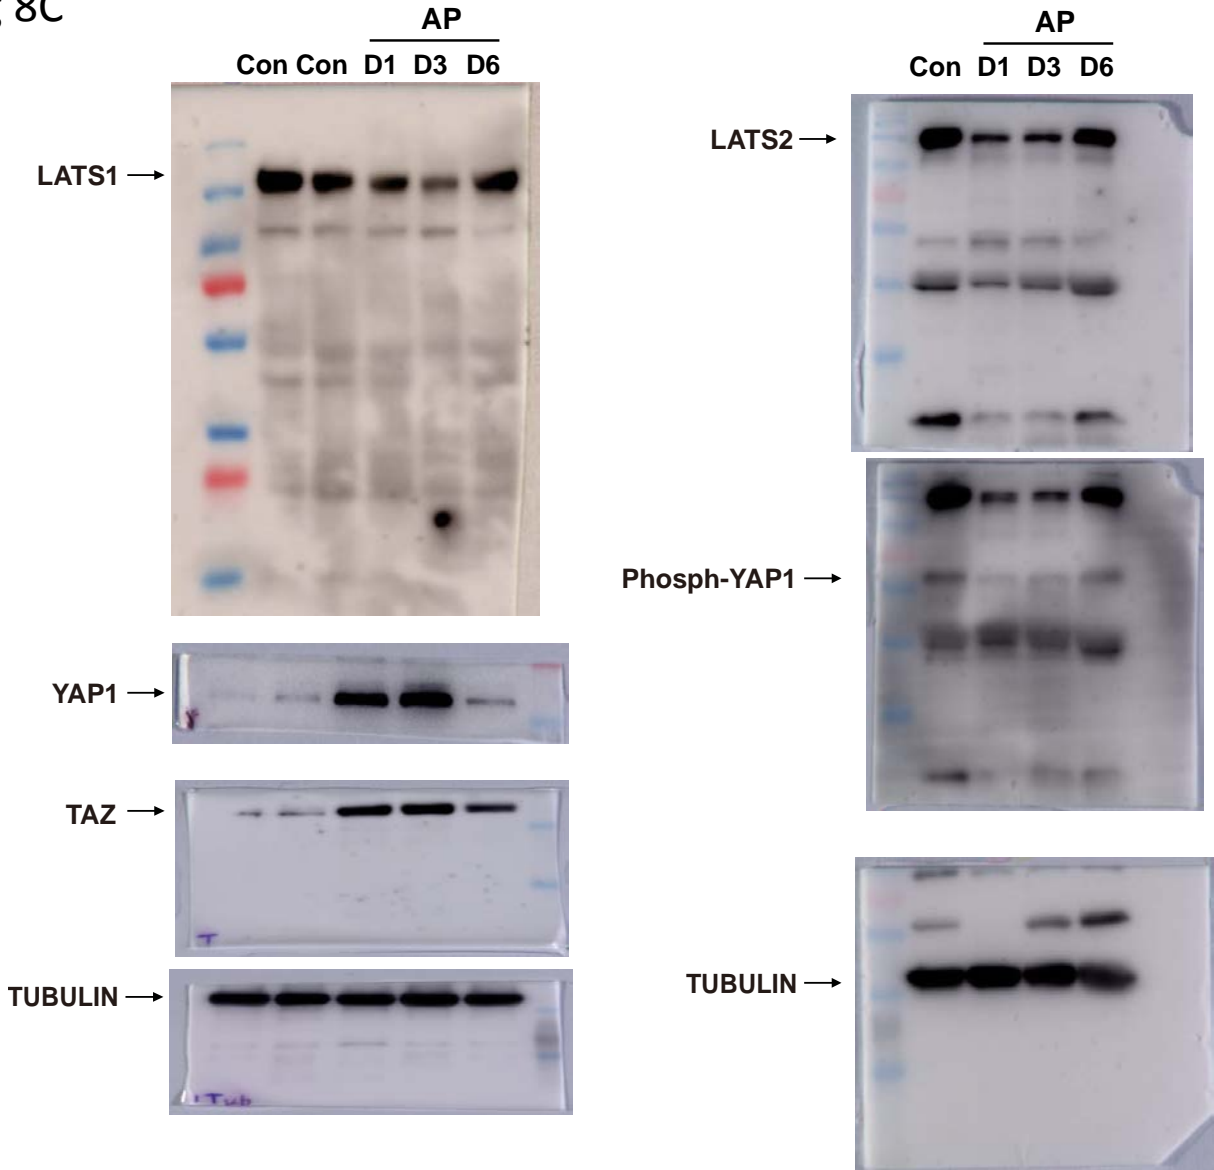

Fig 8F

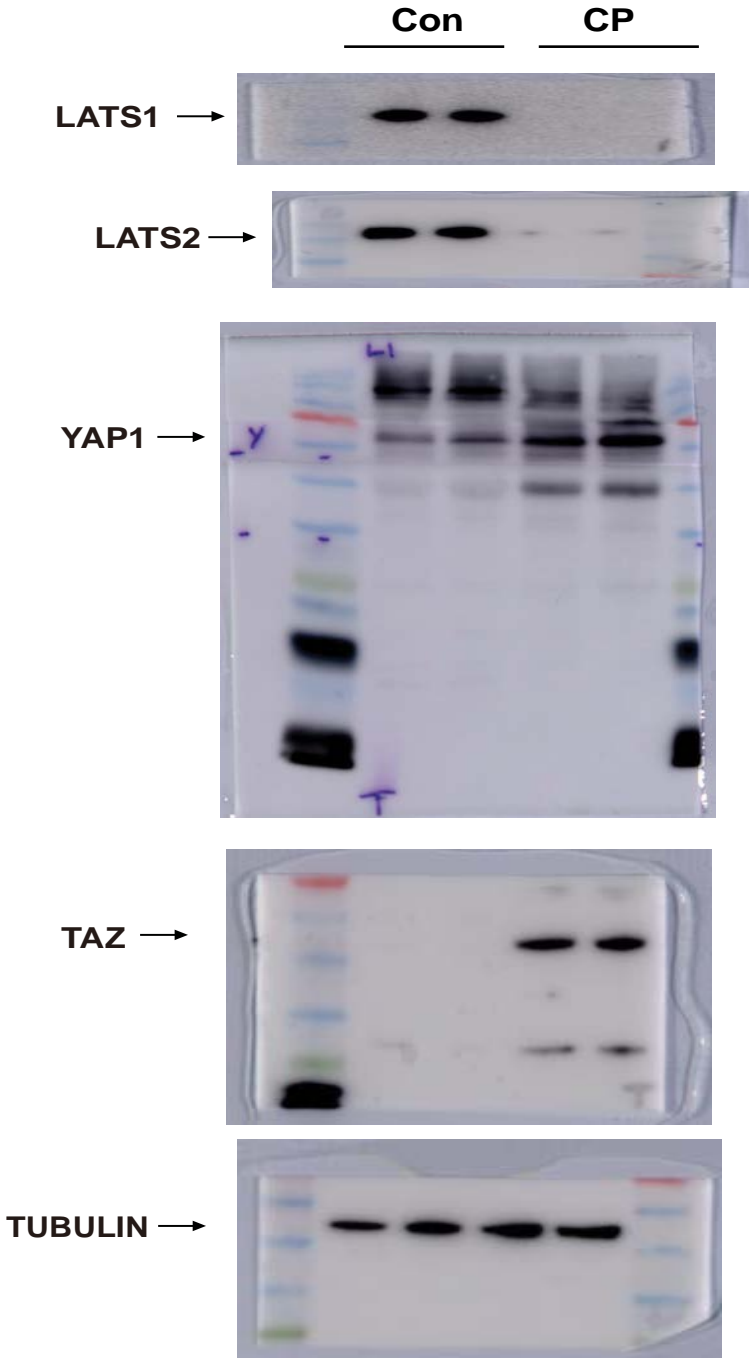

Supplement: pbio.3000418.s016.pdf [file pbio.3000418.s016.pdf]
